# Supplementary material for: A next-generation transistor with low supply voltage operation constructed based on 2D materials' metal–semiconductor phase transition
Source: Royal Society of Chemistry journal article supplement (doi:10.1039/d4mh00662c), 2024-01-01

## Supplementary Information for “A Next-Generation Transistor Constructed on 2D Materials' Metal-Semiconductor Phase Transition and by Low Supply Voltage”

Xingyi Tan<sup>1</sup>, Hengze Qu<sup>2</sup>, Jialin Yang<sup>2</sup>, Shengli Zhang<sup>2,□</sup> and Hua-Hua Fu<sup>3,□</sup>

<sup>1</sup>Department of Physics, Chongqing Three Gorges University, Wanzhou, 404100, China

<sup>2</sup>Key Laboratory of Advanced Display Materials and Devices, Ministry of Industry and Information Technology College of Material Science and Engineering, Nanjing University of Science and Technology, Nanjing 210094, China

<sup>3</sup>School of Physics and Wuhan National High Magnetic Field Center, Huazhong University of Science and Technology, Wuhan 430074, China

Appendix A1: Transport features of the metal-semiconductor phase transition transistor with different substituted gate-length  $L_g=5$  nm, UL= 0, 1, 2 and 3 nm. (a) NP-type,  $V_{DD}=0.10$  V; (b) NP-type,  $V_{DD}=0.05$  V; (c) PN-type,  $V_{DD}=0.10$  V; (d) PN-type,  $V_{DD}=0.05$  V.

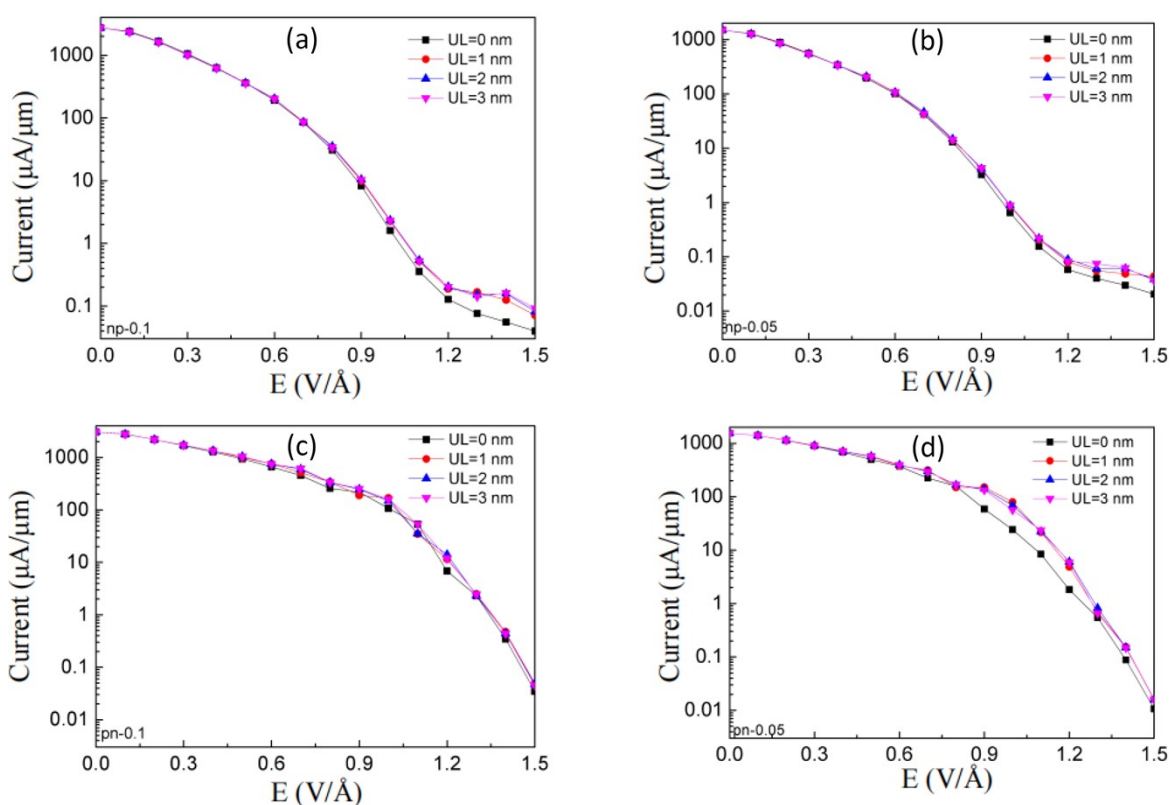

\* Corresponding authors (Hua-hua Fu, email: [hhu@hust.edu.cn](mailto:hhu@hust.edu.cn); Shengli Zhang, email: [zhangslvip@njust.edu.cn](mailto:zhangslvip@njust.edu.cn))

Appendix A2: The local DOSs of the the metal-semiconductor phase transition transistor (PN-type) under the external electric field for the high-performance device applications.

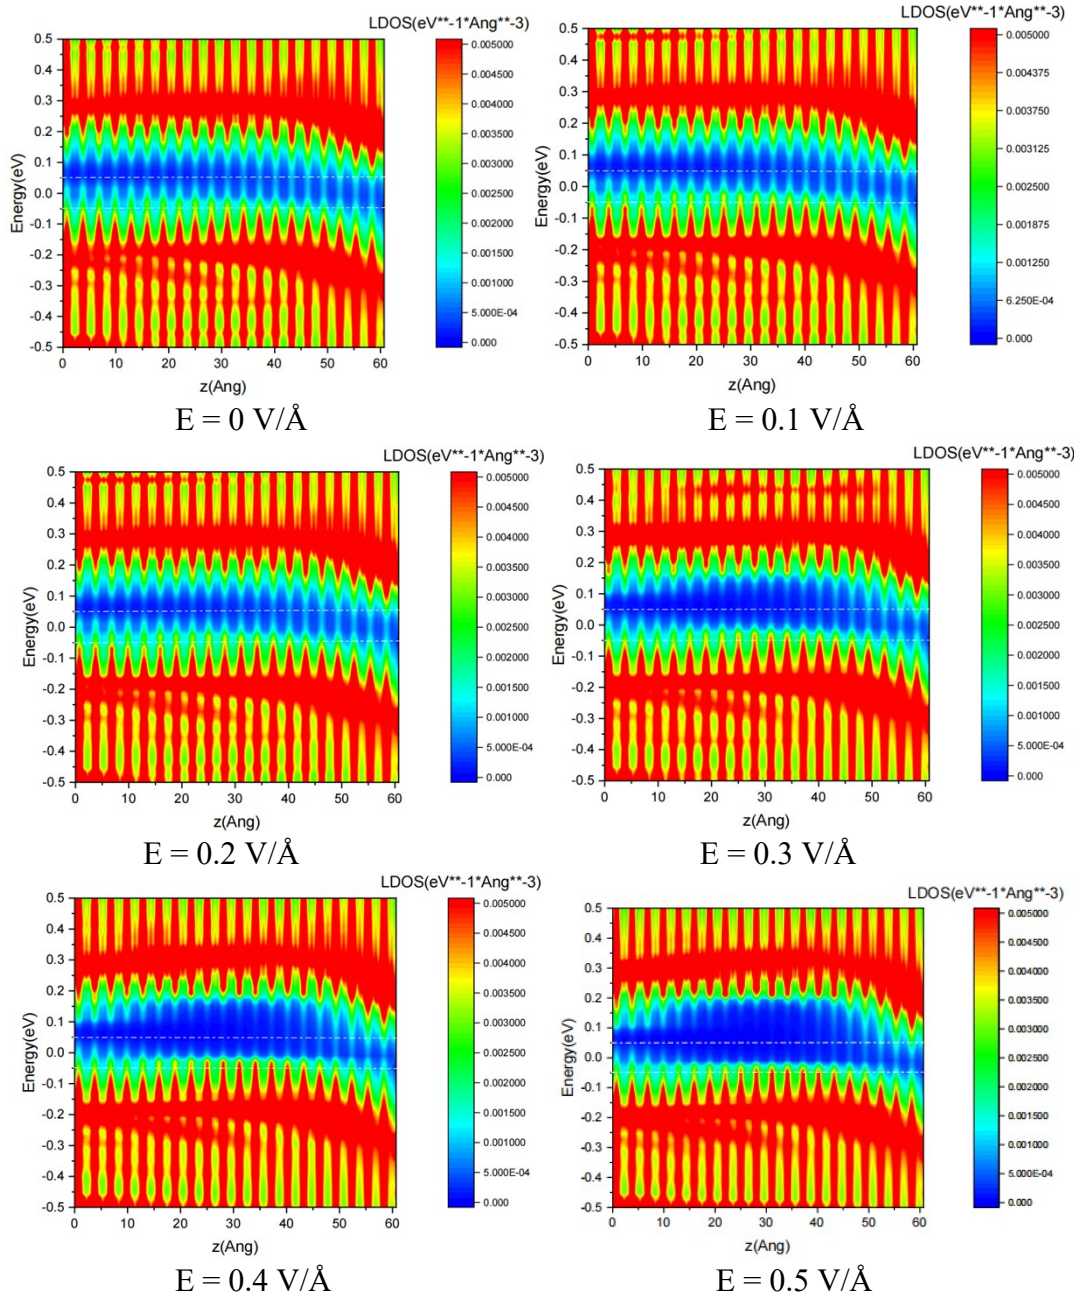

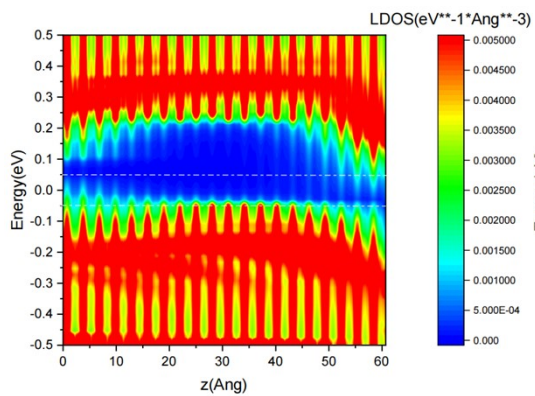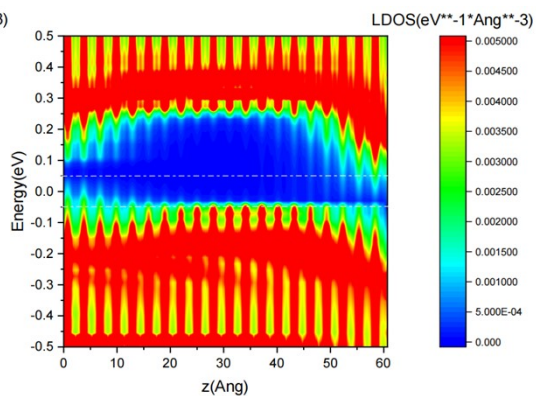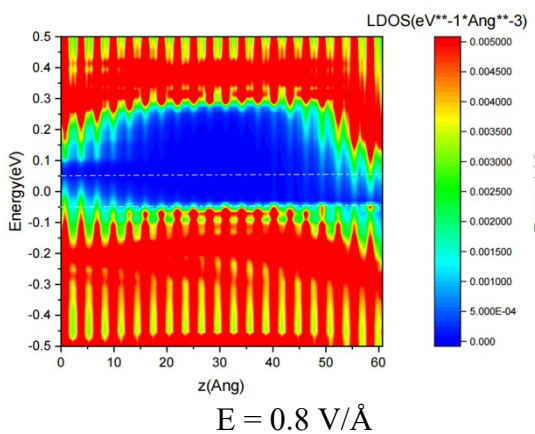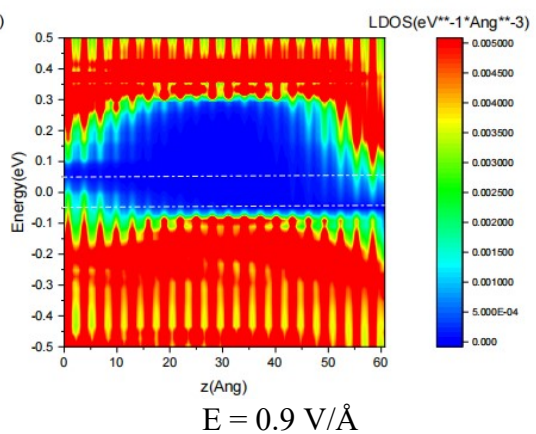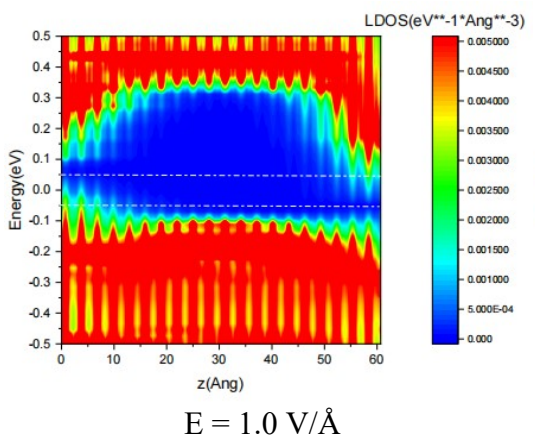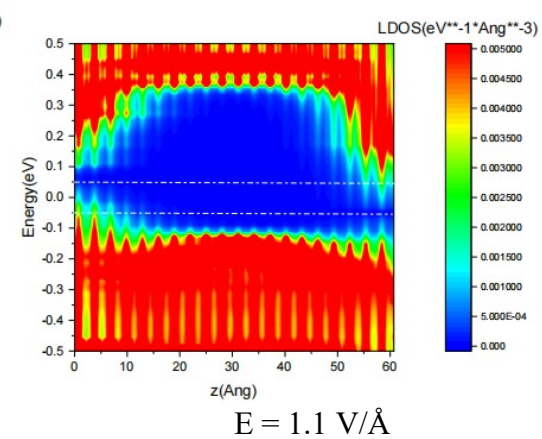

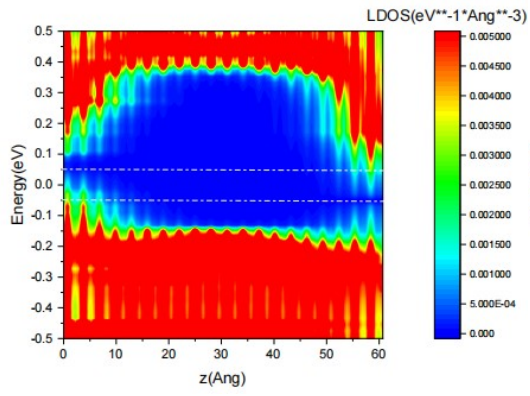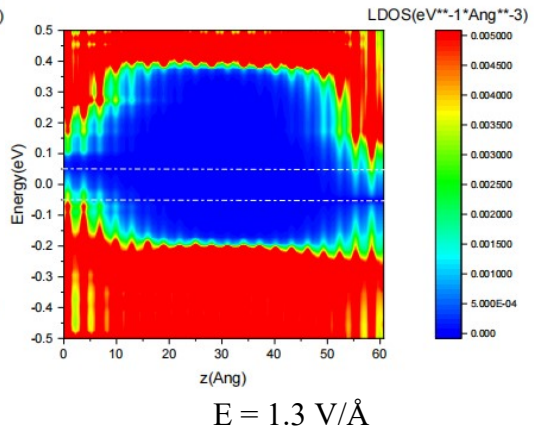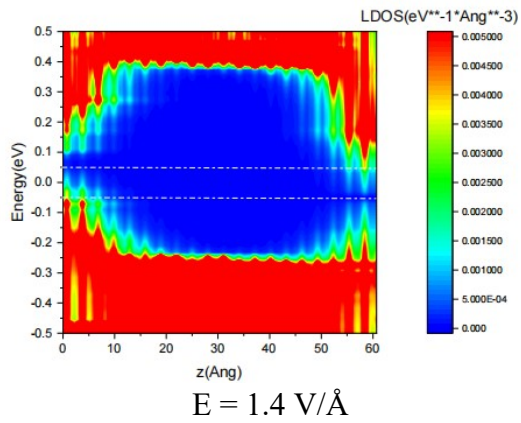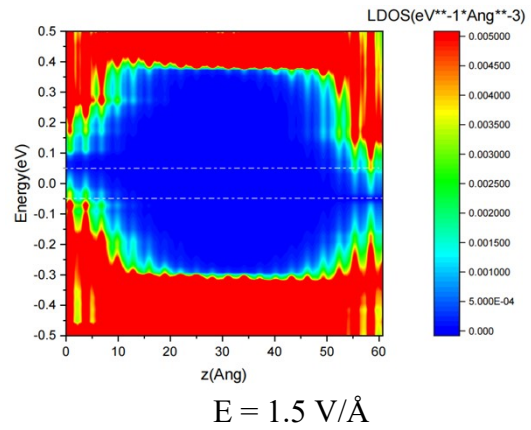

Appendix A3: The local DOSs of the the metal-semiconductor phase transition transistor (NP-type) under the external electric field for the high-performance device applications.

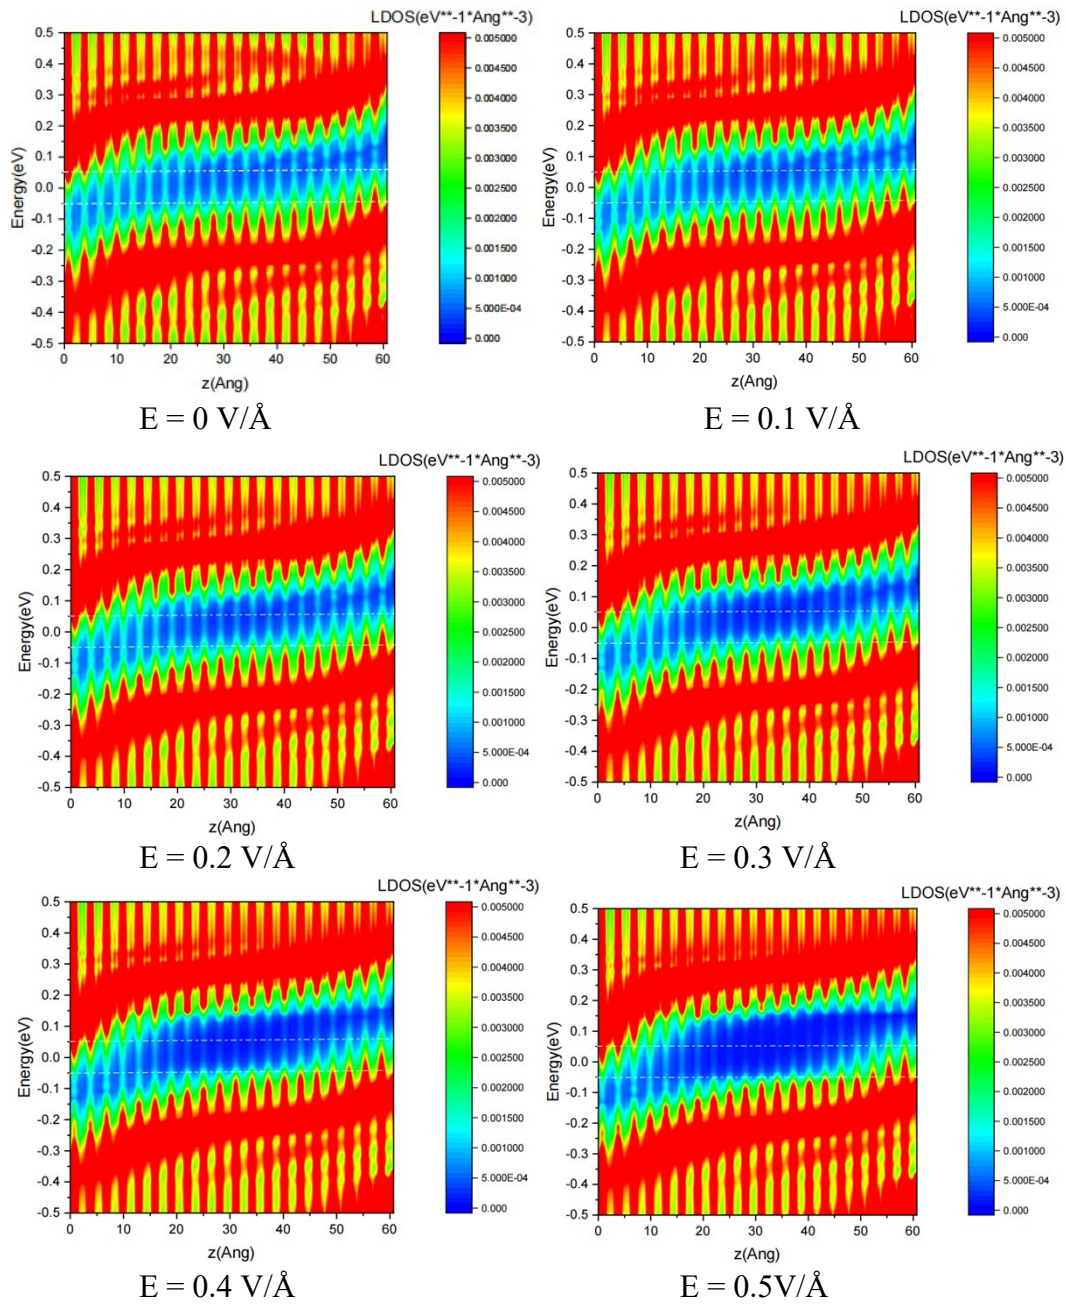

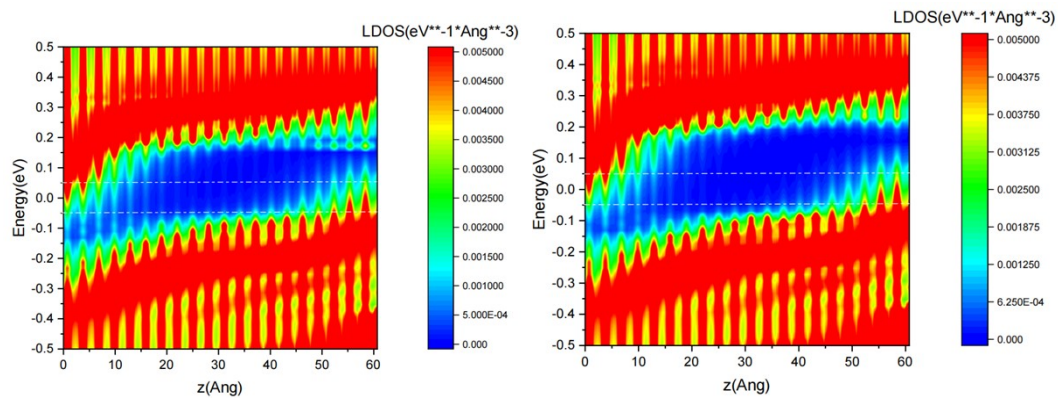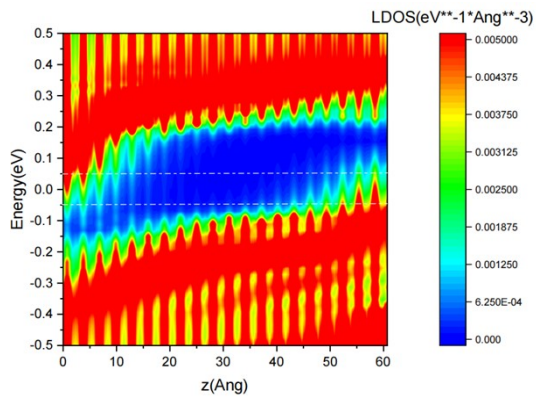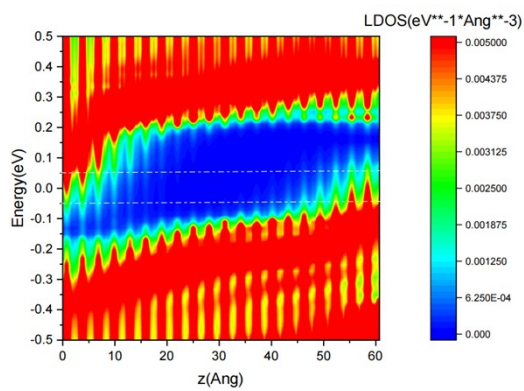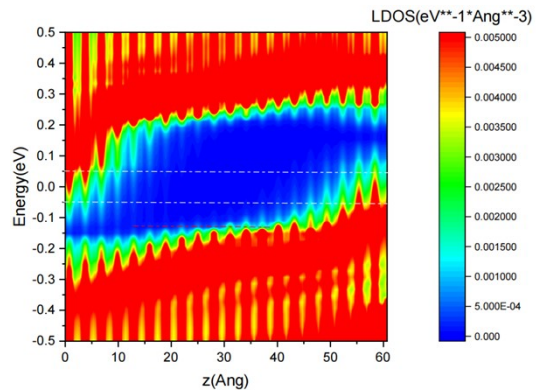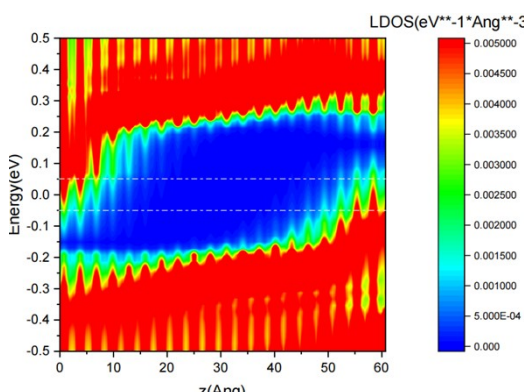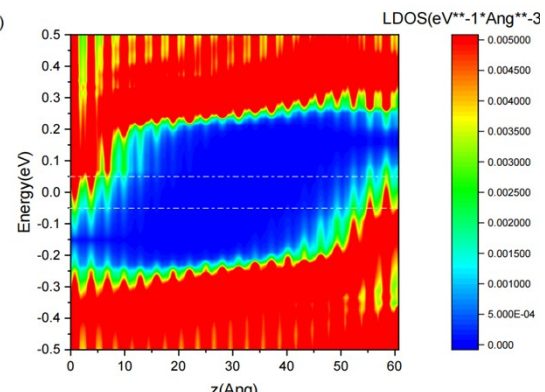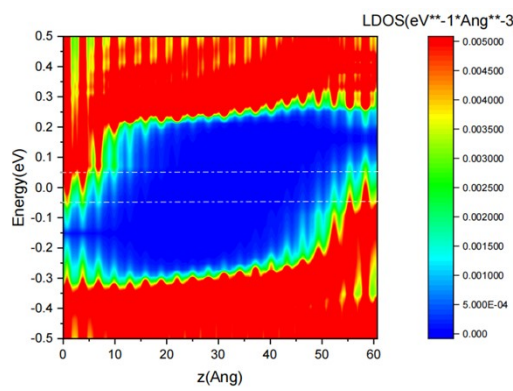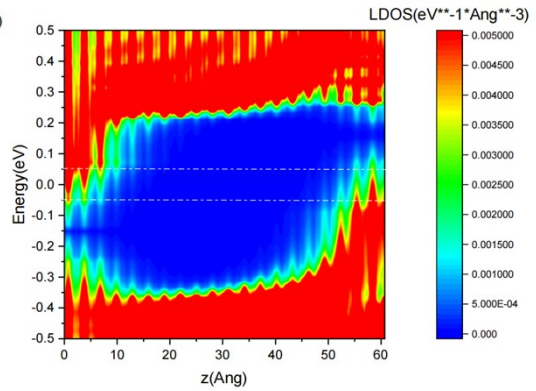

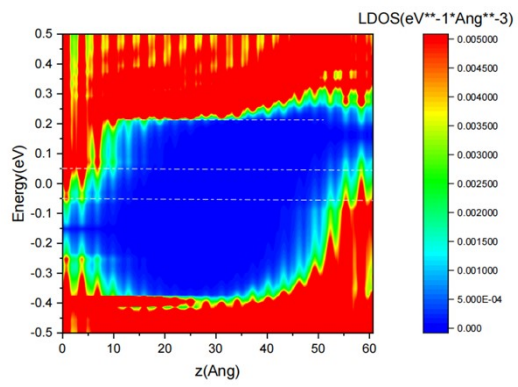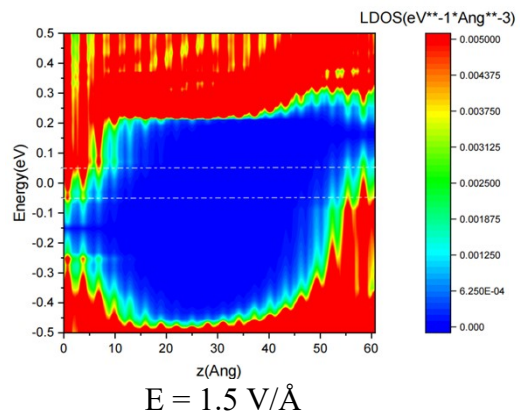

Supplement: d4mh00662c1.pdf [file d4mh00662c1.pdf]
